# Supplementary material for: Optimization models for disaster response operations: a literature review
Source: Springer Nature journal article supplement (doi:10.1007/s00291-024-00750-6), 2024-03-10
Supplement: 291_2024_750_MOESM1_ESM.pdf [file 291_2024_750_MOESM1_ESM.pdf]

# Online Supplement:

## 1. Other relevant review papers:

In Table 1, we present a comprehensive list of relevant review papers. The scope of each article is given in the “Subject area” column taking into account a specific area (e.g., casualty management or relief management) for all types of disasters or exclusively for natural disasters. Some of the surveys present avenues for future research and/or methodological concerns at the tactical or strategic levels. In contrast, other studies focus on specific methodological trends and gaps at the operational level. The “Main OR category” column outlines whether the paper provides an overview of relief operations or focuses on a particular problem area.

### 1.1. Review papers with a systematic review framework

A classic example of a systematic approach can be found in Galindo and Batta (2013) where they first classified papers based on multiple common features using the classification scheme proposed by Altay and Green III (2006) and then employed the classification method proposed by Denizel et al. (2003). The most substantial contribution of their work is an evaluation of the most common assumptions made within the OR literature in DOM and an analysis of the extent to which the existing studies covered the gaps identified previously by Altay and Green III (2006). Anaya-Arenas et al. (2014) followed a systematic selection process to identify 83 relevant articles on relief distribution networks that they classified based on three OR features - the type of data modelling, the scope of the problem, and the problem-solving approach. Leiras et al. (2014) developed a classification framework to review 228 papers through a two-step content analysis. They classified the literature based on ten criteria including the optimization approach, the type and phase of the disaster, the research method, the decision-making level, the coordination level, and stakeholder perspectives. Their review used both qualitative and quantitative content analysis methods previously developed by Seuring et al. (2005). Behl and Dutta (2019) reviewed 362 papers published between 2011 and 2017 in the humanitarian supply chain area. They used the content analysis framework proposed by Mayring (2003) consisting of four steps: material collection, category selection, evaluation of literature, and descriptive analysis. Their study focused on major themes, including humanitarian logistics, research-based theories, case studies, mathematical models, humanitarian supply chain features, information technology, and different types of resources. Kovacs and Moshtari (2019) provided a well-designed methodological roadmap highlighting several critical elements in DOM research. They reviewed a total of 43 papers from 2006 to 2018 emphasizing essential modelling aspects, including problem structure, uncertainty components, and enabling technologies used in model development and implementation. To help increase the quality of the research conducted in the field, they suggested a meta-process for research on humanitarian operations somewhat similar to what we developed in this paper.

### 1.2. Review papers with a general framework

In the following, we review the studies with a general framework that typically focuses on different aspects of a DOM problem or a specific problem type, subject, or relief operation. In this class of review papers, no systematic review framework is provided.

– **Overview of multiple relief operations.** Some review papers classify articles based on specific features, including the type of relief operations (Caunhye et al., 2012; De la Torre et al., 2012; Zheng et al., 2015; Boonmee et al., 2017), the disaster management stage (Ortun˜o et al., 2013; Ozdamar and Ertem, 2015), the type of uncertainty modelling (Hoyos et al., 2015; Liberatore et al., 2013), and other aspects of the relief operations (Overstreet et al., 2011). Using content analysis techniques, Caunhye et al. (2012) classified the literature according to whether the operational stage occurred before or after the disaster’s impact. The authors focused on applications of optimization models to short-term pre-disaster relief logistics operations (e.g., facility location, stock pre-positioning, and evacuation) and post-disaster relief logistics operations (e.g., relief distribution and casualty transportation).

They also discussed the crucial relief operations and activities still missing in the DOM literature. Ozdamar and Ertem (2015) classified the literature according to various problems and modelling approaches and analysed multiple problems associated with the response phase (e.g., casualty and relief transportation, mass casualty evacuation, and vehicle routing) and the recovery phase (e.g., debris management and infrastructure restoration).

– **Reviews specific to a single operation within DOM.** Other review papers focus on a specific operation related to DOM such as inventory management (Balcik et al., 2016), evacuation management (Bayram, 2016), or vehicle routing and facility location models (Amideo et al., 2019). Balcik et al. (2016) reviewed 43 studies that focused on inventory management for the preparedness and response phases of DOM. They evaluated the existing literature based on seven dimensions – stakeholders involved, disaster type, demand characteristics, decisions taken/length of the planning horizon, variety of the facilities involved, choice of performance measures, and methodological aspects (i.e., solution type, type of model, and solution approach). Bayram (2016) reviewed 191 papers on large-scale emergency evacuation models and their optimization-based solution methodologies considering different human behaviour and transportation strategies. He classified the literature based on the type of mathematical model, traffic assignment, evacuation, evacuee behaviour, and shelter location, among others. Amideo et al. (2019) identified the challenges of utilizing optimization models in DOM for facility location and evacuation routing problems under four modelling phases (conceptual modelling, optimization methodologies, experimentation, and implementation). In addition, they analysed nine case studies according to six categories, including stakeholder involvement, evacuation modes, modelling inputs and parameters, evacuee and system behaviour, and optimization methodologies.

To the best of our knowledge, there is only one survey (Sabbaghtorkan et al., 2020) that focuses on natural disaster logistics in DOM using OR methodologies. Their work centres on the prepositioning of assets and supplies in the preparedness phase of DOM. In contrast, our study concentrates entirely on the response phase of DOM. Thus, when compared to the existing review papers discussed above, we believe that the first contribution of our work is the analysis of optimization models focused on the response phase of DOM and their classification according to the natural disaster type under study. Secondly, we analyze the most recent optimization methodologies. Thirdly, we analyze questions and assumptions identified by three main literature surveys as open questions for each type of natural disaster and identify the current challenges. Finally, we highlight further research directions, linking our findings with those arising from previous surveys.

Table 1: Characterization of the review papers in DOM published in Q1 and Q2 journals (SJR,2019) between 2010 and 2020.

| Reference                   | Subject area                           | Review level                     | Main OR category                       | Operations stage |              |          |          | Period    | Journal*     | # Papers |
|-----------------------------|----------------------------------------|----------------------------------|----------------------------------------|------------------|--------------|----------|----------|-----------|--------------|----------|
|                             |                                        |                                  |                                        | Mitigation       | Preparedness | Response | Recovery |           |              |          |
| Overstreet et al. (2011)    | Humanitarian logistics                 | Strategic, tactical              | General models                         | ✓                | ✓            | ✓        | ✓        | 1995-2009 | JHLSCM       | 51       |
| Caunhye et al. (2012)       | Emergency logistics                    | Operational                      | General models                         | ✓                | ✓            | ✓        | ✓        | 1970-2012 | SEPS         | N/A      |
| De la Torre et al. (2012)   | Disaster management                    | Operational                      | Vehicle routing models                 | ✓                | ✓            | ✓        | ✓        | 1987-2011 | SEPS         | 29       |
| Galindo and Batta (2013)    | Disaster management                    | Strategic, tactical              | General models                         | ✓                | ✓            | ✓        | ✓        | 2005-2010 | EJOR         | 155      |
| Liberatore et al. (2013)    | Humanitarian logistics                 | Strategic, tactical              | Uncertainty models                     | ✓                | ✓            | ✓        | ✓        | 2005-2012 | Book chapter | N/A      |
| Ortuño et al. (2013)        | Humanitarian logistics                 | Strategic, tactical              | Decision support models                | ✓                | ✓            | ✓        | ✓        | 2005-2012 | Book chapter | N/A      |
| Anaya-Arenas et al. (2014)  | Relief management                      | Operational                      | General models                         | -                | ✓            | ✓        | -        | 1990-2013 | ANOR         | 83       |
| Leiras et al. (2014)        | Humanitarian logistics                 | Strategic, tactical              | General models                         | ✓                | ✓            | ✓        | ✓        | 1980-2012 | JHLSCM       | 228      |
| Hoyos et al. (2015)         | Disaster operations management         | Operational                      | Uncertainty models                     | ✓                | ✓            | ✓        | ✓        | 2006-2012 | C&IE         | 101      |
| Özdamar and Ertem (2015)    | Humanitarian logistics                 | Operational                      | General models & enabling technologies | -                | -            | ✓        | ✓        | 1998-2014 | EJOR         | N/A      |
| Zheng et al. (2015)         | Disaster relief operations             | Strategic, tactical              | Evolutionary Optimization models       | ✓                | ✓            | ✓        | ✓        | 2004-2014 | ASC          | 69       |
| Bakik et al. (2016)         | Relief management                      | Operational                      | Inventory models                       | -                | ✓            | ✓        | -        | 2008-2015 | SORMS        | 43       |
| Gupta et al. (2016)         | Disaster management                    | Strategic, tactical              | General models                         | ✓                | ✓            | ✓        | ✓        | 1957-2014 | POM          | 28       |
| Gutjahr and Nolz (2016)     | Humanitarian aid                       | Strategic, tactical              | Multi-criteria optimization            | ✓                | ✓            | ✓        | ✓        | 2007-2015 | EJOR         | N/A      |
| Habib et al. (2016)         | Humanitarian SCM                       | Operational                      | General models                         | -                | -            | -        | ✓        | 2005-2015 | MPE          | 94       |
| Bayram (2016)               | Network evacuation management          | Operational                      | Optimization models                    | -                | -            | ✓        | -        | N/A       | SORMS        | 191      |
| Çelik (2016)                | Humanitarian operations                | Strategic, tactical              | General models                         | -                | -            | -        | ✓        | 2000-2016 | SORMS        | 100      |
| Boonmee et al. (2017)       | Humanitarian logistics                 | Operational                      | Facility location models               | -                | ✓            | ✓        | -        | 1950-2016 | IJDRR        | N/A      |
| Zhou et al. (2018)          | Natural Disaster management            | Strategic, tactical              | General models                         | ✓                | ✓            | ✓        | ✓        | 2000-2016 | IJDRR        | 100      |
| Amideo et al. (2019)        | Disaster management                    | Operational                      | Vehicle routing & facility location    | -                | -            | ✓        | -        | 1980-2016 | EJOR         | N/A      |
| Behl and Dutta (2019)       | Humanitarian SCM                       | Strategic, tactical              | General models                         | ✓                | ✓            | ✓        | ✓        | 2011-2017 | ANOR         | 362      |
| Kovacs and Moshtari (2019)  | Humanitarian operations                | Operational                      | General models                         | ✓                | ✓            | ✓        | ✓        | 2006-2018 | EJOR         | 43       |
| Farahani et al. (2020)      | Casualty management                    | Operational                      | General models                         | -                | -            | ✓        | -        | 1977-2019 | EJOR         | 88       |
| Sabbaghtorkan et al. (2020) | Humanitarian logistics                 | Operational                      | General models                         | -                | ✓            | -        | -        | 2000-2018 | EJOR         | 74       |
| This paper                  | Natural disaster operations management | Strategic, tactical, operational | Optimization models                    | -                | -            | ✓        | -        | 2013-2022 |              | 127      |

\*European Journal of Operational Research (EJOR), Annals of Operations Research (ANOR), International Journal of Disaster Risk Reduction (IJDRR), Production and Operations Management (POM), Mathematical Problems in Engineering (MPE), Surveys in Operations Research and Management Science (SORMS), Socio-Economic Planning Sciences (SEPS), Computers and Industrial Engineering (C&IE), Journal of Humanitarian Logistics & Supply Chain Management (JHLSCM), Applied Soft Computing (ASC)

## 2. Statistics about the characteristics of the articles

Figure 1 shows that the journals Transportation Research Part E: Logistics and Transportation Review (TRE) and ANOR dominated with respect to the number of recent OR publications regarding natural disaster relief operations. ANOR accounts for a significant portion of the recent publications in this domain due to the two special issues on the application of OR to Disaster Relief Operations (DRO) published in the journal in 2017 and 2018. Figure 2 displays the breakdown of the 127 articles by year and type of natural disaster. Between 2013 and 2022, approximately 58% of the studies concentrated on earthquakes while 14%, 18%, and 10% were devoted to hurricanes, floods, and other natural disasters, respectively. The category “Other” in this figure denotes natural disasters with a limited number of publications such as wildfires, typhoons, storms, landslides and tsunamis. Between 2013 and 2015, an average of six articles were published each year. For 2016 and 2017, the number of papers published rose to 13. Between 2018 and 2020, the number of published papers ranged from 19 to 24 per year, and finally, in 2021 and 2022, the number of published articles are 13 and 9, respectively. Overall, we see a clear upward trend in the number of optimization papers in DOM in recent years. While more than 50% of the studies are devoted to earthquakes, the numbers also suggest an increasing interest in extreme weather-related disasters such as hurricanes and cyclones. Interestingly, the proportion of research devoted to each type of natural disaster is not all that linked to the trends of natural disasters occurring worldwide, which are displayed in Figure 3.

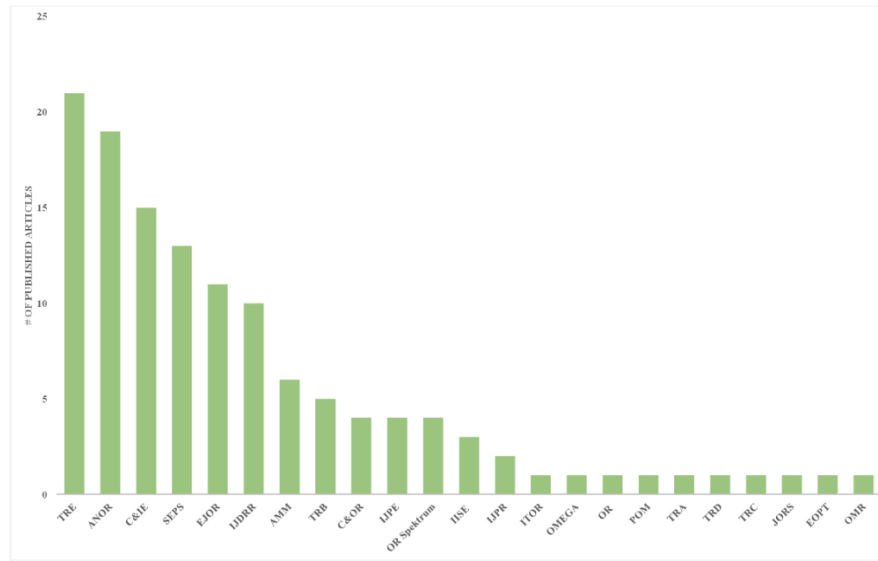

**Figure 1:** Number of articles in the selection published in different Q1 and Q2 OR&MS journals between 2013 and 2022.

**Abbreviations:** Transportation Research Part E: Logistics and Transportation Review (TRE), Computers and Industrial Engineering (C&IE), Socio-Economic, Planning Sciences (SEPS), Annals of Operations Research (ANOR), European Journal of Operational Research (EJOR), International Journal of Disaster, Risk Reduction (IJDRR), Applied Mathematical Modeling (AMM), Transportation Research Part B: Methodological (TRB), Computers and Operations, Research (C&OR), International Journal of Production Economics (IJPE), International Journal of Production Research (IJPR), International Transactions in Operational Research (ITOR), Operations Research (OR), Production and Operations Management (POM), Transportation Research Part A: Policy and Practice (TRA), Transportation Research Part D: Transport and Environment (TRD), Transportation Research Part C: Emerging Technologies (TRC), Operations Management Research (OMR), IISE Transactions (IISE), Journal of Operations Research Society (JORS).

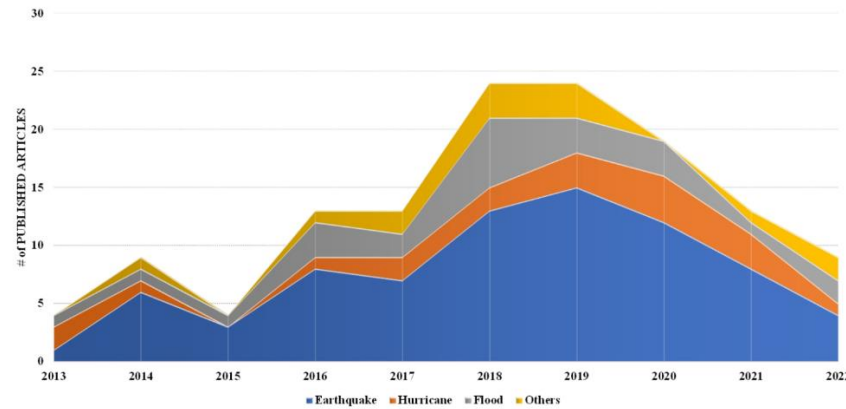

**Figure 2:** Trend in the number of papers published in OR&MS journals between 2013 and 2022 by disaster type.

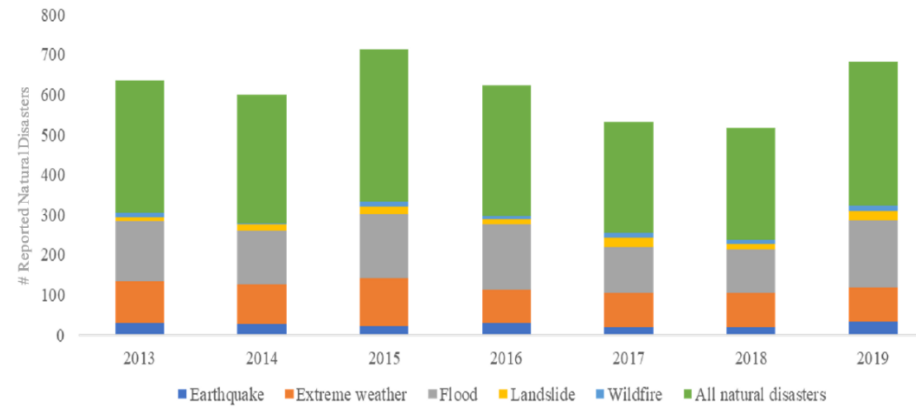

**Figure 3:** Number of globally reported natural disasters from 2013 to 2019 by type and year. Source: [CRED \(2020\)](#).

### 3. Grouping articles by various factors (Tables S1 to S9)

The term “relief commodity” in the definition of categories RD and FSL&RD refers to commodities such as food, water, blood products, medicine, hygiene kits, blankets, and medical supplies, excluding personnel and equipment. For each category mentioned above, we analysed the papers with regard to decision variables, constraints, objectives, solution methods, uncertainty modelling, sources of uncertainty, geographical location, and relief items considered. All relevant information related to the optimization models proposed in the papers is summarized in Tables S1 to S9 in the online supplement. In Tables S1, S2, and S3, the main decision variables and constraints of each model are provided, where papers are classified by natural disaster and relief operation category. Standard constraints related to most models such as flow conservation constraints for transportation problems and non-negativity constraints are excluded. Similarly, in Tables S4 to S6, the objective function and associated solution approach for each paper are presented under the same classification. Tables S7 and S8 characterize the papers, grouped by type of natural disaster, based on the source of uncertainty and the approach to modelling uncertainty. Finally, Table S9 provides additional information regarding relief resources and geographical location. Relief resources are classified into five main groups (food and water; medicine, medical kits, medical supplies, and hygiene kits; blood products; equipment, tents, and blankets; and general relief items). Excluded are vehicles and human resources since these are common to most location, transportation, and relief distribution problems. The term “facility” used in the tables applies to all types of facilities, including shelters, production centres, donor collection centres, hospitals, temporary medical units, and warehouses. In addition, the term “relief item” refers to all types of relief resources, including perishable items like food, water, blood products, and medicine, and imperishable commodities such as beds and other types of equipment.

**Table S1** Group “RD” papers: Decision variables and constraints for all types of natural disasters

| Author                                        | ND* | Decision variables**                                                    | Constraints***                                                                                                 |
|-----------------------------------------------|-----|-------------------------------------------------------------------------|----------------------------------------------------------------------------------------------------------------|
| <a href="#">Akbarpour et al.</a>              | E   | RD, IVRT, SHRT at hospitals, Agreement with supplier, supplier contract | NOF, commodity expiry, min RD, min IVRT target, RD to facilities, DSC, Supplier contract, supplier's lead-time |
| <a href="#">Baskaya et al.</a>                | E   | FL, RD, LRT, IVRT                                                       | LRT, TD, FC, RD                                                                                                |
| <a href="#">Bozorgi-Amiri et al.</a>          | E   | RP and RD from distribution centres, IVRT, FL                           | FL, RS, RD, NOF                                                                                                |
| <a href="#">Cheraghi</a>                      | E   | RC, RD, IVRT, SHRT, facility functionality, PT                          | NOF, FC, IVRT, DSC, patient treatment priority                                                                 |
| <a href="#">Gao</a>                           | E   | RS and RD, NOV                                                          | RD, RS, NOV, VC, NOV                                                                                           |
| <a href="#">Gao and Cao</a>                   | E   | RS and RD, NOV                                                          | RS, FC, DSC, IVRT, VC, ROC                                                                                     |
| <a href="#">Hosseini-Motlagh et al.</a>       | E   | RD, SHRT, blood expiry, and usage possibility                           | RD, DSC, FL, min and max IVRT, min DSC, IVRT policy, blood usage possibility by patients, NOF                  |
| <a href="#">Huang &amp; Rezvan</a>            | E   | ROC, relief items delivery, route selection                             | number of roads, RD, TW of RD, FC, VC                                                                          |
| <a href="#">Huang et al.</a>                  | E   | RD                                                                      | route accessibility, VC, max RD                                                                                |
| <a href="#">Kamyabniya et al.</a>             | E   | RD, IVRT, blood wastage, SHRT, VU                                       | IVRT policy, min RD target, FC, NOF, DSC, the max daily VU, RD target, max production, number of blood donors  |
| <a href="#">Khalilpourazari &amp; Khamseh</a> | E   | FL, RD, IVRT, SHRT, VU                                                  | IVRT, temporary shelters movement, DSC, RD, max RS, FC, NOV                                                    |

|                                    |   |                                                                                                  |                                                                                                                      |
|------------------------------------|---|--------------------------------------------------------------------------------------------------|----------------------------------------------------------------------------------------------------------------------|
| Liberatore et al.                  | E | RD                                                                                               | RD, RS threshold                                                                                                     |
| Lu et al.                          | E | RD                                                                                               | RS, FC, IVRT                                                                                                         |
| Ni et al.                          | E | FO, RP, SHRT, unused IVRT,                                                                       | IVRT, FC, RD threshold                                                                                               |
| Ransikarbun & Mason                | E | RD, disrupted roads and facilities, setup cost for network restoration, SHRT                     | transportation budget, restoration funds, facility availability, FC, ROC, road utilization, NOF that can be restored |
| Sakiani et al.                     | E | arrival time of vehicles, RD, VU                                                                 | Max SHRT, VU, NOV, VU                                                                                                |
| Sheu                               | E | RD, amount of relief services required                                                           | RD, relief item availability, FC                                                                                     |
| Torabi et al.                      | E | FS and FO, RD, IVRT unused, SHRT                                                                 | FC, multiple procurement policies, min RS of each supplier, DSC, procurement budget                                  |
| Zhang et al. (2019a)               | E | RD, IVRT                                                                                         | RS, RD, min security rate to ensure fairness, VC                                                                     |
| Zhang et al. (2019b)               | E | RD                                                                                               | min reliability of relief network, RS                                                                                |
| Zhou et al.                        | E | RD, IVRT, SHRT                                                                                   | RS level                                                                                                             |
| Abazari et al.                     | F | FL, RD, IVRT                                                                                     | Max TD, Max RD, NOF, TT, TW for RD, VC limit                                                                         |
| Alem et al.                        | F | NOV contracted and used for RD, IVRT, RD, unused BD                                              | RS, NOV, RS, BD                                                                                                      |
| Doan and Shaw                      | F | RD                                                                                               | TT, number of relief teams, FC, relief items' requirement, BD                                                        |
| Garrido et al.                     | F | RD to demand points, VU, IVRT                                                                    | DSC, NOV, IVRT, FL                                                                                                   |
| Hu et al. (2017)                   | F | Selection of suppliers, FS, FC, IVRT, and RD                                                     | Max IVRT, Max surplus of relief items, number of suppliers serving relief facilities                                 |
| Hu et al. (2019)                   | F | FS, NOV, expansion FC, SHRT                                                                      | NOF, NOV, RD, VC of relief items                                                                                     |
| Rivera-Royero et al. (2016)        | F | VU, BD remaining, RD                                                                             | initial BD, VC, VU, FC                                                                                               |
| Rivera-Royero et al. (2020)        | F | VU, BD remaining, RD, number of relief teams hiring                                              | initial BD, VC, VU, FC                                                                                               |
| Rodríguez-Espindola et al. (2018b) | F | relief staff target, SHRT, FO, personnel allocation to hospitals, RD, VU, facility functionality | max RP, RD, number of personnel, FO, NOV, VU                                                                         |
| Davis et al.                       | H | RS, RD, SHRT                                                                                     | IVRT, FC, TW of disaster regions, min DSC                                                                            |
| Escudero et al.                    | H | RS, RD, FC, ROC, the fraction of usable commodities                                              | type of investment, FC, relief item protection at facilities, IVRT                                                   |
| Grass et al.                       | H | RP, FL, SHRT and unusable, RD                                                                    | NOF, ROC, RD under road destruction                                                                                  |
| Kelle et al.                       | H | RS at suppliers, PT, RD, SHRT, surplus                                                           | FC of State level and Federal level storage centers, max capacity of cities for evacuees, FC                         |
| Mondal et al.                      | H | RA                                                                                               | RA threshold,                                                                                                        |
| Nagurney et al.                    | H | RD                                                                                               | FC, min-max demand for relief items                                                                                  |
| Velasquez et al.                   | H | RP, FO, relief procurement, RD                                                                   | RS limit, ROC, IVRT                                                                                                  |
| Shahparvari et al. (2016)          | W | VU start time, total vehicle onboarding load                                                     | VU, TW for RD                                                                                                        |

\*ND: natural disaster; E: Earthquake; F: Flood; H: Hurricane; W: Wildfire, \*\* Decision (RD: relief distribution; RS: relief supply; IVRT: inventory level of relief items; SHRT: shortage level of relief items; FL: facility location; LRT: lateral relief transshipment; RP: relief prepositioning; PT: patient transportation; RA: relief items allocation; FO: facility opening; VU: vehicle utilization; BD: relief budget; NOV: number of vehicles), \*\*\*Constraints (TW: time window; ROC: road capacity; FC: facility capacity; VC: vehicle capacity; TT: transportation time; NOF: number of facilities; TD: travel distance; NOV: Number of vehicles; DSC: demand satisfaction coverage)

**Table S2** Group "FSL& RD" papers: Decision variables and constraints for all types of natural disasters

| Author           | ND* | Decision variable**                | Constraints***                                                                |
|------------------|-----|------------------------------------|-------------------------------------------------------------------------------|
| Ahmadi et al.    | E   | FL, VU, RD, unused relief items    | DSC, VU, vehicle return to same-depot                                         |
| Baharmand et al. | E   | FL, RD, IVRT, route accessibility, | Max coverage time, DSC, RD, FC, NOF, VC, ROC                                  |
| Cavdur et al.    | E   | FO, RD, SHRT                       | relief supply, facility capacity, number of facilities, facility safety level |

|                                    |    |                                                                                        |                                                                                                              |
|------------------------------------|----|----------------------------------------------------------------------------------------|--------------------------------------------------------------------------------------------------------------|
| Fazli-Khalaf et al.                | E  | RC, RD, FL, shelter movement, blood donor allocation to facilities                     | facility coverage, max RD, technology utilization, FC, NOV                                                   |
| Ghasemi et al.                     | E  | FL, RD, PT to shelters, VU, unused relief items, SHRT                                  | Min and Max FC, NOF, RS, VC of relief items and injuries                                                     |
| Samani et al.                      | E  | FL, blood donation, production, and transportation, SHRT, wastage, IVRT                | FL, NOF, max DSC, FC, max RC, relief item expiry, production capacity, min IVRT                              |
| Habibi-Kouchaksaraei et al.        | E  | RC, RD, IVRT, SHRT, FL                                                                 | FC, FC for patients, DSC                                                                                     |
| Haeri et al.                       | E  | FL, RD, IVRT, unserved injuries, demand dissatisfaction                                | Max RS, RD possibility, FC, min DSC, min number of evacuees should be assigned to shelters, the max IVRT, RD |
| Hassani & Mokhtari                 | E  | Accessibility of vulnerable locations, FC expansion, SHRT, IVRT, RD, FL, FO            | RD, BD, TW for FO, FC expansion                                                                              |
| Jabbarzadeh et al.                 | E  | FL, FO, RC, SHRT, IVRT                                                                 | RS, temporary shelters relocation, DSC, blood donation level, FC                                             |
| Khalilpourazari et al.             | E  | FL, RC, IVRT, SHRT, RD, VU, PT                                                         | DSC, FC, max NOV, VC, IVRT                                                                                   |
| Maharjan and Hanaoka               | E  | RD, FO, facility allocation                                                            | service coverage of relief distribution centers, NOF, the target level of opening facilities                 |
| Mahootchi & Golmohammadi           | E  | RP, facility operationality, RD, IVRT, SHRT                                            | RS target for delivery, non-limit LRT, ROC, max IVRT, FC, route accessibility                                |
| Mohammadi                          | E  | RD, IVRT, SHRT, FL                                                                     | DSC, FC, IVRT, BD, DSC, RD                                                                                   |
| Mohammadi & Yaghoubi               | E  | FL, patient assignment to hospitals, RD                                                | Min DSC, shelters service coverage to injuries, TW for transportation, level of backup usage                 |
| Noyan & Kahvecioglu                | E  | FL, RD                                                                                 | NOF, FC, RS, equity-based allocation policy, BD                                                              |
| Paul and MacDonald                 | E  | RS at distribution centers, FL                                                         | BD, RD, FC, NOF                                                                                              |
| Rahmani et al.                     | E  | FL, IVRT, RD                                                                           | DSC, facility disruption possibility, FC, primary and backup suppliers, BD                                   |
| Rennemo et al.                     | E  | FO, VU, RD                                                                             | RD, IVRT, max NOV, ROC, DSC, VC, BD                                                                          |
| Rezaei-Malek et al.                | E  | RD, SHRT, FO, remaining relief item usable, IVRT                                       | IVRT, the lifetime of relief items, SHRT, RD through available routes, BD, the equity level                  |
| Sanci & Daskin                     | E  | FL, RD, number of equipment used for the restoration of routes, relief equipment usage | FL, FC, route availability, number of restoration equipment, repairing time of equipment, DSC, BD            |
| Tofighi et al.                     | E  | FO, RD, SHRT                                                                           | max TT, demand equity                                                                                        |
| Wang et al. (2021)                 | E  | RC, RD, IVRT, FS, a surplus of relief items, SHRT                                      | RD, RS threshold, DSC, FC                                                                                    |
| Wang et al. (2014)                 | E  | FO, VU, RD, SHRT                                                                       | Vehicle start-return at the same depot, RD, RS level, VC                                                     |
| Yahyaee & Bozorgi-Amiri            | E  | FL, FO, RD                                                                             | DSC, TD, FC, NOF, backup relief support                                                                      |
| Zarrinpour et al.                  | E  | FL, patient assignment to hospitals                                                    | min-max NOF, service quality of hospitals                                                                    |
| Zokaee et al.                      | E  | RD, FL, SHRT                                                                           | RS level, min DSC rate, RD fairness, FC                                                                      |
| Manopiniwes & Irohara              | F  | FO, RD, IVRT                                                                           | FC, IVRT, DSC, RD, evacuee receiving service                                                                 |
| Mollah et al.                      | F  | FS, VU                                                                                 | number of evacuees, TW for RD                                                                                |
| Moreno et al. 2016                 | F  | VU, RD, IVRT, SHRT                                                                     | Initial SHRT and IVRT, min and max NOV, route availability, ROC, facility functionality time target,         |
| Moreno et al. 2018                 | F  | VU, RD, IVRT, SHRT                                                                     | RS, VC, NOV, availability of routes, max ROC                                                                 |
| Rodriguez-Espindola et al. (2018a) | F  | FO, SHRT, personnel allocation to hospitals, RD, VU                                    | max prepositioning of relief items, RD, number of personnel, FO, NOV, VU                                     |
| Safaei et al.                      | F  | FL, RD, SHRT                                                                           | FC, level of purchase of relief items, supplier capacity, IVRT                                               |
| Li et al.                          | H  | FO, RA                                                                                 | NOF, DSC                                                                                                     |
| Paul & Zhang                       | H  | RS at distribution centers, RD                                                         | BD, RD, FC                                                                                                   |
| Wang et al. (2021)                 | H  | FL, RP, RD, SHRT, surplus                                                              | TD, road utilization time limit, FC, NOF, LRT                                                                |
| Gu et al.                          | TS | FL, FC, RD, patient allocation to shelters.                                            | FC for patients, RD, max BD, FL possibility                                                                  |
| Sheu & Pan                         | TY | PT, injuries treatment, RD                                                             | ROC, FC, number of evacuees                                                                                  |

\*ND: natural disaster; E: Earthquake; F: Flood; H: Hurricane; W: Wildfire, \*\* Decision (RD: relief distribution; RS: relief supply; IVRT: inventory level of relief items; SHRT: shortage level of relief items; FL: facility location; LRT: lateral relief transshipment; RP: relief prepositioning; PT: patient transportation; RA: relief items allocation; FO: facility opening; FS: facility selection; VU: vehicle utilization; BD: relief budget; NOV: number of vehicles), \*\*\*Constraints (TW: time window; ROC: road capacity; FC: facility capacity; VC: vehicle capacity; TT: transportation time; NOF: number of facilities; TD: travel distance; NOV: Number of vehicles; DSC: demand satisfaction coverage)

**Table S3** Group "FSL" and "ET" papers: Decision variables and constraints for all types of natural disasters

| Author                      | ND* | Problem                                                                                                                    | Decision variable**                                                                             | Constraints***                                                                                                         |
|-----------------------------|-----|----------------------------------------------------------------------------------------------------------------------------|-------------------------------------------------------------------------------------------------|------------------------------------------------------------------------------------------------------------------------|
| Baharmand et al.            | E   | <b>FSL</b>                                                                                                                 | FO, RD, FL                                                                                      | Max coverage time, DSC, RD, FC, NOF, VC, ROC                                                                           |
| Kilci et al.                | E   |                                                                                                                            | FL, assigning an affected region to relief facilities                                           | FC, NOF, TD, facility utilization threshold, DSC                                                                       |
| Kinay et al.                | E   |                                                                                                                            | FL, assigning an affected region to relief facilities                                           | Shelter service coverage, FC, the min utilization rate of shelters                                                     |
| Wei et al.                  | F   |                                                                                                                            | FO, VU, vehicle service start time                                                              | IVRT, RD, VU, vehicle start-return at the same depot                                                                   |
| Li et al. (2020)            | F   | <b>ET</b>                                                                                                                  | FL, assigning an affected region to relief facilities                                           | NOF, FC for injuries, shelter service coverage                                                                         |
| Liu et al. (2018)           | E   |                                                                                                                            | PT, number of evacuees transferring to relief facilities, VU, SHRT                              | Max mobilization levels of relief personnel and critical population, NOV, number of relief personnel, max VU limit, FC |
| Shirinpour & Mahdavi-Amiri  | E   |                                                                                                                            | FL, PT, VU                                                                                      | NOF, NOV, number of injuries, FC, shelter service level                                                                |
| Liu et al. (2019b)          | E   |                                                                                                                            | RD, PT, unserved injuries, SHRT, VU                                                             | FC, VU possibility, VC                                                                                                 |
| Liu (2020)                  | E   |                                                                                                                            | Serving injuries at relief facilities, FS                                                       | shelter service coverage, the time window for casualty treatment, NOF                                                  |
| Najafi et al. 2013          | E   |                                                                                                                            | RD, PT, VU, SHRT                                                                                | RD, number of injuries, transportation policy for injuries, and RD, FC                                                 |
| Najafi et al. 2014          | E   |                                                                                                                            | RD, PT, VU, SHRT                                                                                | RD, number of injuries, transportation policy for injuries, and RD, FC                                                 |
| Perez-Galarce et al. (2017) | E   |                                                                                                                            | PT, evacuee selection for delivery to facilities                                                | PT rate, FC, NOF, shelter utilization level                                                                            |
| Sabouhi et al.              | E   |                                                                                                                            | VU, PT, RD, the arrival time of vehicle                                                         | vehicle start-return at the same depot, min level PT, VC, IVRT, FC, NOV, TW for RD, the arrival time of vehicles       |
| Setiawan et al.             | E   |                                                                                                                            | RD, FL, PT, VU                                                                                  | SHRT, VC, NOF, NOV, number of casualties, FC, vehicle availability                                                     |
| Li et al. (2020)            | F   | PT, RD                                                                                                                     | FC for relief items and injuries                                                                |                                                                                                                        |
| Yi et al.                   | H   | the evacuation order, VU                                                                                                   | evacuation order                                                                                |                                                                                                                        |
| Mejia-Argueta et al.        | F   | VU, FO, RD                                                                                                                 | VC, ROC, min and max FC, facility service coverage, NOF, Min facility utilization threshold, BD |                                                                                                                        |
| Zhu et al.                  | F   | PT, VU, arrival time of patients to the medical center                                                                     | VU, VC of injuries, vehicle arrival TW, max tolerable suffering duration                        |                                                                                                                        |
| Shahparvari & Abbasi (2017) | W   | VU, FS                                                                                                                     | FC, VC for injuries, TW for VU                                                                  |                                                                                                                        |
| Zhou and Erdogan (2019)     | W   | relief teams hiring, relief teams delivery, RD, the possibility of an area become an entirely burned or a high-risk region | BD, number of equipment, number of personnel, RS level, resource availability, RD               |                                                                                                                        |

\*ND: natural disaster; E: Earthquake; F: Flood; H: Hurricane; W: Wildfire, \*\* Decision (RD: relief distribution; RS: relief supply; IVRT: inventory level of relief items; SHRT: shortage level of relief items; FL: facility location; LRT: lateral relief transshipment; RP: relief prepositioning; PT: patient transportation; RA: relief items allocation; FO: facility opening; FS: facility selection; VU: vehicle utilization; BD: relief budget; NOV: number of vehicles), \*\*\*Constraints (TW: time window; ROC: road capacity; FC: facility capacity; VC: vehicle capacity; TT: transportation time; NOF: number of facilities; TD: travel distance; NOV: Number of vehicles; DSC: demand satisfaction coverage)

**Table S4** Group "RD" papers: Objective functions and solution approaches for all types of natural disasters

| Author                      | ND* | Objective function                                                                                                                                                                                   | Solution approach                     |
|-----------------------------|-----|------------------------------------------------------------------------------------------------------------------------------------------------------------------------------------------------------|---------------------------------------|
| Akbarpour et al.            | E   | min cost (setting up option contracts with suppliers, procurement, establishing warehouses, inventory holding, transportation, unmet demand), max-min amount of covered demand in each affected area | Exact                                 |
| Baskaya et al.              | E   | min average travel distance per the relief item, including vulnerability effect.                                                                                                                     | Exact                                 |
| Bozorgi-Amiri et al.        | E   | min total relief cost (facility setup, procurement, inventory holding, transportation, relief shortage), min shortage                                                                                | Lp-metric                             |
| Cheraghi & Hosseini-Motlagh | E   | min cost (facility establishment, transportation, inventory), min-max shortage                                                                                                                       | the fuzzy-VIKOR, interactive approach |

|                                      |   |                                                                                                                                                                                                          |                                                                         |
|--------------------------------------|---|----------------------------------------------------------------------------------------------------------------------------------------------------------------------------------------------------------|-------------------------------------------------------------------------|
| Gao                                  | E | Min dissatisfaction level for all commodities, min expected total transportation time                                                                                                                    | Exact                                                                   |
| Gao and Cao                          | E | Min expected total unmet demand for relief items, and min expected total transportation time                                                                                                             | Scenario-based approach, epsilon-constraint method                      |
| Hosseini-Motlagh et al. (2020)       | E | Min expected total shortage of blood products, Min total cost (opening facilities, purchasing blood, delivery, and shortage)                                                                             | Compromise programming                                                  |
| Huang & Rezvan                       | E | Max fulfillment equity, Min variance of deprivation time                                                                                                                                                 | A heuristic algorithm                                                   |
| Huang et al.                         | E | Maximize Equality, Min delay time, Min delay cost or consequence of delay for the injuries                                                                                                               | Rolling horizon approach, variational inequality                        |
| Kamyabniya et al. (2018)             | E | Min delivery time, Min total operational costs (blood production, inventory, and wastage, delivery)                                                                                                      | A heuristic coordination approach                                       |
| Khalilpourazari & Khamseh            | E | Min cost (facility establishment, moving temporary blood facilities, storing, shortage), Min transportation time                                                                                         | Lp-metric, goal programming                                             |
| Liberatore et al.                    | E | Maximize Demand Coverage                                                                                                                                                                                 | An iterative coordinated heuristic approach, lexicographic optimization |
| Lu et al.                            | E | Min Delivery time                                                                                                                                                                                        | Rolling Horizon                                                         |
| Ni et al.                            | E | Min relief costs                                                                                                                                                                                         | Benders decomposition                                                   |
| Ransikarbum & Mason                  | E | Min total cost (funds spent for route restoration, relief transportation), Min shortage, Max equality                                                                                                    | Goal programming                                                        |
| Sakiani et al.                       | E | Min deprivation and operating costs                                                                                                                                                                      | Specialized simulated annealing (SA)                                    |
| Sheu                                 | E | Min total cost, Max Lifesaving Utility                                                                                                                                                                   | Exact                                                                   |
| Torabi et al.                        | E | Min total cost (facility establishment cost, relief procurement, inventory, supplier agreement, relief distribution, shortage)                                                                           | Differential evolution (DE) algorithm                                   |
| Zhang et al. (2019a)                 | E | Min expected total transportation time, cost, shortage                                                                                                                                                   | fuzzy approach, approximation approach                                  |
| Zhang et al. (2019b)                 | E | Min relief shortage, Min deviation supplies for the forecasted demand, Min number of prepositioned items                                                                                                 | Exact                                                                   |
| Zhou et al.                          | E | Min shortage of relief items, Min risk of the resource cannot be delivered to disaster areas                                                                                                             | An evolutionary algorithm based on decomposition                        |
| Abazari et al.                       | F | min travel distance, min-cost (relief center establishing, relief items acquisition, vehicle purchasing, inventory holding), min-max travel time to demand points, min total quantity of perished items. | Lp-metric, Grasshopper optimization                                     |
| Alem et al.                          | F | min cost (prepositioning stock, renting vehicles, inventory, and unmet demand)                                                                                                                           | A two-phase heuristic approach                                          |
| Doan and Shaw                        | F | Min cumulative shortfall of relief resources, Min total number of relief equipment & specialists                                                                                                         | Exact                                                                   |
| Garrido et al.                       | F | Min cost (transporting relief products, vehicle movement among depots)                                                                                                                                   | A heuristic sample average approximation method                         |
| Hu et al.                            | F | Min expected cost (inventory, procurement of relief items, and shortage)                                                                                                                                 | Exact                                                                   |
| Hu et al.                            | F | Min relief cost (vehicle rental, transportation, shortage, facility locating)                                                                                                                            | Progressive hedging algorithm (PHA)                                     |
| Rivera-Royero et al. (2016)          | F | Min total shortage of relief items                                                                                                                                                                       | Exact                                                                   |
| Rivera-Royero et al.(2020)           | F | Min total shortage of relief items                                                                                                                                                                       | Exact                                                                   |
| Rodríguez-Espindola et al. (2018a,b) | F | Min cost (location of facilities, personnel, procurement, transportation), Min-Max shortage                                                                                                              | Weighted sum method, Epsilon-constraint                                 |
| Davis et al.                         | H | min expected cost ( relief prepositioning, relief distribution and redistribution, shortage)                                                                                                             | Exact                                                                   |
| Escudero et al.                      | H | Min expected cost (facility selection investment, commodity transportation, shortage)                                                                                                                    | A decomposition algorithm                                               |
| Grass et al.                         | H | Min cost (opening facilities, prepositioning, transportation, and unsatisfied demand)                                                                                                                    | L-Shaped, Interior Point Method                                         |
| Kelle et al.                         | H | Min expected cost (relief transportation, surplus and shortage), Min-Max regret                                                                                                                          | L-Shaped                                                                |
| Mondal et al.                        | H | Min resource shortage                                                                                                                                                                                    | Particle swarm optimization (PSO) approach                              |
| Nagurney et al. (2016)               | H | Max financial fund gain through coordination among relief entities through Generalized Nash Equilibrium                                                                                                  | Variational inequality                                                  |
| Velasquez et al. (2020)              | H | Min total cost (warehouse setup, relief prepositioning, surplus, shortage)                                                                                                                               | Column-and-constraint generation algorithm                              |
| Shahparvari et al. (2017)            | W | Min operational cost                                                                                                                                                                                     | Interactive fuzzy programming                                           |



**Table S5** Group "FSL& RD" papers: Objective functions and solution approaches for all types of natural disasters

| Author                      | ND* | Objective function                                                                                                                                                     | Solution approach                                                                                                |
|-----------------------------|-----|------------------------------------------------------------------------------------------------------------------------------------------------------------------------|------------------------------------------------------------------------------------------------------------------|
| Ahmadi et al.               | E   | min total distribution time, penalty cost of unsatisfied demand, fixed cost of opening local depots.                                                                   | Meta-heuristics variable neighborhood search (VNS) algorithm                                                     |
| Baharmand et al.            | E   | min cost (transportation, relief personnel), min time (setup, operation)                                                                                               | Augmented epsilon-constraint                                                                                     |
| Cavdur et al. (2016)        | E   | min total travel distance, the total number of facilities, shortage                                                                                                    | Exact                                                                                                            |
| Fazli-Khalaf et al.         | E   | Min total cost (facility establishment, relief item collection, transportation, holding), min transportation time, max reliability of blood products' testing          | Exact                                                                                                            |
| Ghasemi et al.              | E   | Min Unserved Injuries, Min cumulative shortfall of relief resources, Min cost (relief centers and shelters establishment, provision and transportation of commodities) | A heuristic Epsilon-constraint and NSGA-II approach                                                              |
| Samani et al. (2016)        | E   | Min cost (facility establishment, transportation, operating, human resource, inventory), min-max shortage, min time-span                                               | Interactive fuzzy                                                                                                |
| Habibi-Kouchaksaraei et al. | E   | Min cost (opening shelters and facilities, transporting blood units, testing and processing of blood products, holding and distribution), min-max shortage             | Exact, goal programming                                                                                          |
| Haeri et al.                | E   | Min shortage of relief items, Min cost (facility locating, operating, transporting, and holding of relief items), min expected value of transportation of relief costs | Fuzzy-goal programming approach                                                                                  |
| Hassani & Mokhtari          | E   | Min relief cost, Min-max regret in the total cost                                                                                                                      | Rolling horizon approach, Exact                                                                                  |
| Jabbarzadeh et al.          | E   | Min expected cost (facility locating, moving shelters to other locations, operating, transportation, inventory, and shortage)                                          | Exact                                                                                                            |
| Khalilpourazari et al.      | E   | Min cost (facility establishment, moving temporary blood facilities, storing, shortage), Min transportation time, Min-Max of shortage                                  | Lexicographic weighted Tchebycheff method                                                                        |
| Maharjan and Hanaoka        | E   | Min total cost (operating cost of open facilities, transportation)                                                                                                     | Exact                                                                                                            |
| Mahootchi & Golmohammadi    | E   | Min total cost (transportation, resource holding, shortage, and surplus cost)                                                                                          | Exact                                                                                                            |
| Mohammadi et al. (2016)     | E   | Max total expected demand coverage, Min total relief costs, Min-Max dissatisfaction rate                                                                               | Particle swarm optimization (PSO) approach                                                                       |
| Mohammadi & Yaghoubi        | E   | Min travel time, Min total relief costs                                                                                                                                | Epsilon constraint                                                                                               |
| Noyan & Kahvesioglu         | E   | Max accessibility to central depots and distribution centers                                                                                                           | Scenario decomposition-based branch-and-cut algorithm                                                            |
| Paul and MacDonald          | E   | Min total expected cost (fatality, supply, facility establishment)                                                                                                     | An iterative heuristic                                                                                           |
| Rahmani et al.              | E   | Min total cost (transportation, disrupted facilities, and unreliable centers not disrupted)                                                                            | Lagrangian relaxation and an iterative heuristic algorithm                                                       |
| Rennemo et al.              | E   | Max Lifesaving Utility                                                                                                                                                 | Exact                                                                                                            |
| Rezaei-Malek et al.         | E   | Min Response Time, Min total cost                                                                                                                                      | An interactive approach (The reservation level Tchebycheff procedure)                                            |
| Sanci & Daskin              | E   | Min total cost (facility establishment, restoration equipment)                                                                                                         | A heuristic approach, Sample average approximation                                                               |
| Tofghi et al.               | E   | Min Delivery time, Min total cost (operational, facility location, inventory)                                                                                          | Differential evolution (DE) algorithm                                                                            |
| Wang et al. (2020)          | E   | Min total cost (inventory, transportation)                                                                                                                             | KKT condition, interior point algorithm                                                                          |
| Wang et al. (2014)          | E   | Min-max (travel time), Min total cost (facility establishment, transportation), Max-Min route reliability for all the serving vehicles                                 | non-dominated sorting genetic algorithm (NSGA-II), non-dominated sorting differential evolution algorithm (NSDE) |
| Yahyaei & Bozorgi-Amiri     | E   | Min total evacuation cost (transportation of relief items and evacuees, facility opening)                                                                              | Exact                                                                                                            |
| Zarrinpour et al.           | E   | Min cost (facility location, patient transportation)                                                                                                                   | Benders decomposition algorithm                                                                                  |
| Zokaei et al.               | E   | Min cost (location of facilities, relief delivery, shortage)                                                                                                           | Exact                                                                                                            |
| Manopiniwes & Irohara       | F   | Min expected costs                                                                                                                                                     | Weighted sum method                                                                                              |
| Mollah et al.               | F   | Min cost (transportation of relief resources and injuries, a penalty of the un-evacuated population)                                                                   | Genetic algorithm (GA)                                                                                           |
| Moreno et al. (2016)        | F   | Min total expected cost (opening and operating relief centers, vehicle assignment, transportation, shortage)                                                           | An iterative heuristic                                                                                           |

|                                      |    |                                                                                                                  |                                                                              |
|--------------------------------------|----|------------------------------------------------------------------------------------------------------------------|------------------------------------------------------------------------------|
| Moreno et al. (2018)                 | F  | Min total cost, Min human-suffering                                                                              | An iterative heuristic                                                       |
| Rodriguez-Espindola et al. (2018a,b) | F  | Min cost (location of facilities, personnel, procurement, transportation), Min-Max shortage                      | Weighted sum method, Epsilon-constraint                                      |
| Safaei et al.                        | F  | Min total cost, Min total supply risk for all suppliers                                                          | A Technique for Order Preference by Similarity to an Ideal Solution (TOPSIS) |
| Li et al. (2018)                     | H  | Min travel distance, Min-max regret                                                                              | Exact                                                                        |
| Paul & Zhang                         | H  | Min expected cost (medical supplies, facilities setup, transportation, fatality, deprivation)                    | Exact                                                                        |
| Wang et al. (2021)                   | H  | Min expected cost (facility location, commodity procurement, the shipment of relief items, shortage and holding) | Exact                                                                        |
| Gu et al.                            | TS | Max Demand Coverage                                                                                              | Heuristic Greedy Approach                                                    |
| Sheu & Pan                           | TY | Min distance, Min total cost (operational, psychological)                                                        | Exact                                                                        |

\*ND: natural disaster; E: Earthquake; F: Flood; H: Hurricane; W: Wildfire; TS: Tsunami; TY: Typhoon

**Table S6** Group "FSL" and "ET" papers: Objective functions and solution approaches for all types of natural disasters

| Author                      | ND* | Relief problem | Objective function                                                                                                                                | Solution approach                                                                                  |
|-----------------------------|-----|----------------|---------------------------------------------------------------------------------------------------------------------------------------------------|----------------------------------------------------------------------------------------------------|
| Baharmand et al.            | E   | FSL            | min cost (transportation, relief personnel), min time (setup, operation)                                                                          | A heuristic approach                                                                               |
| Kilci et al.                | E   |                | Max demand coverage                                                                                                                               | Exact                                                                                              |
| Kinay et al.                | E   |                | Max demand coverage                                                                                                                               | Goal Programming, Epsilon-constraint                                                               |
| Wei et al.                  | F   |                | Min time window for relief delivery, min total operational cost (facility opening, vehicle utilization, and transportation)                       | A hybrid ant colony optimization (ACO) algorithm                                                   |
| Li et al. (2017)            | H   |                | Min total construction cost of shelters                                                                                                           | Cross-entropy method                                                                               |
| Liu (2020)                  | E   | ET             | Min total distance to facility centers, Min number of opened relief facilities                                                                    | Genetic algorithm (GA), Technique for Order Preference by Similarity to an Ideal Solution (TOPSIS) |
| Liu et al. (2018)           | E   |                | Min cost (shortage, delivery of relief items, recruiting vehicles, transportation cost)                                                           | Exact                                                                                              |
| Shirinpour & Mahdavi-Amiri  | E   |                | Min relief time (establishment of facilities, transportation)                                                                                     | Genetic Algorithm (GA)                                                                             |
| Najafi et al. (2013)        | E   |                | Min Unserved Injuries, Min total number of relief equipment, vehicles, shelters, and specialists, Min relief shortage                             | An iterative heuristic                                                                             |
| Najafi et al. (2014)        | E   |                | Min Unserved Injuries and Min shortage of relief items                                                                                            | Rolling horizon, Exact                                                                             |
| Perez-Galarce (2017)        | E   |                | Min total travel distance                                                                                                                         | Exact                                                                                              |
| Sabouhi et al.              | E   |                | Min total arrival times of vehicles at affected areas, shelters, and distribution centers                                                         | A Memetic algorithm                                                                                |
| Setiawan et al.             | E   |                | Min unmet demand, Min-Max injuries suffering                                                                                                      | A heuristic approach                                                                               |
| Zhu et al.                  | F   |                | Min total cost (transportation, absolute deprivation, relative deprivation)                                                                       | Ant colony optimization (ACO) algorithm                                                            |
| Mejia-Argueta et al.        | F   |                | Min-Max evacuation time, Min-Max relief distribution time, Min total cost (facility location, relief prepositioning and distribution, evacuation) | Epsilon Constraint, Weighted sum approach                                                          |
| Yi et al.                   | H   |                | Min total travel relief time, travel and sheltering at home risk                                                                                  | The augmented Lagrangian algorithm, progressive hedging algorithm (PHA)                            |
| Li et al. (2020)            | H   |                | Min expected cost (facility opening, prepositioning relief items, resource allocation, evacuation, unevacuated penalty)                           | Progressive hedging algorithm (PHA)-augmented Lagrangian relaxation                                |
| Shahparvari & Abbasi (2017) | W   |                | Max total number of evacuees                                                                                                                      | Heuristic Greedy Approach                                                                          |
| Zhou & Erdogan (2019)       | W   |                | Min total expected evacuees, Min total expected cost (relief teams hiring, resource allocation, property losses)                                  | Goal programming                                                                                   |

\*ND: natural disaster; E: Earthquake; F: Flood; H: Hurricane; W: Wildfire

**Table S7** Group papers: Uncertainty modeling for Earthquake type of natural disaster

| Author                             | Uncertainty modeling*           | Source of Uncertainty                                                                                                                                |
|------------------------------------|---------------------------------|------------------------------------------------------------------------------------------------------------------------------------------------------|
| Acar & Kaya                        | Two-stage ST                    | Service rate for hospital, demand rate, hospital damage rate                                                                                         |
| Ahmadi et al.                      | Two-stage ST                    | Travel times, accessibility between each location.                                                                                                   |
| Akbarpour et al.                   | Two-stage ST, min-max RO        | the demand for relief items                                                                                                                          |
| Bozorgi-Amiri et al.               | RO, ST                          | transportation cost, the fraction of usable demand and supply, demand and supply of relief items                                                     |
| Cavdur et al. (2016)               | Two-stage ST                    | the demand for relief items                                                                                                                          |
| Cheraghi & Hosseini-Motlagh (2020) | RO, FZP                         | supply and demand of relief items, accessibility rate of relief centers, the distance among relief centers, and demand points                        |
| Fazli-Khalaf et al.                | RO, CCP, FZP                    | relief costs, transportation time, facility capacity, the demand for relief item                                                                     |
| Gao                                | EVST                            | demand for relief items, availability of roads                                                                                                       |
| Gao and Cao                        | EVST                            | demand for relief items, traffic flow                                                                                                                |
| Ghasemi et al.                     | ST-CCP                          | demand for relief items, the number of injuries, the capacity of facilities, relief costs, remaining usable items, the functionality of vehicles     |
| Samani et al. (2018)               | Two-stage ST, FZP               | Relief costs, transportation time, facility capacity, the demand for relief item, travel distance, maximum servicing coverage                        |
| Habibi-Kouchaksaraei et al.        | Scenario-based RO               | relief cost, facility capacity, the demand for injuries for treatment, useful rate of relief items                                                   |
| Haeri et al.                       | FZP, CCP                        | demand for relief items, the number of injuries                                                                                                      |
| Hassani & Mokhtari                 | Scenario-based RO               | demand for relief items, the capacity of relief centers, operationality of centers, accessibility rate for receiving relief at the affected location |
| Hosseini-Motlagh et al. (2020)     | RO, FZP, ST                     | demand for blood, shortage, inventory, and purchase costs of blood products, facility opening cost, the supply of blood, rate of disruption          |
| Jabbarzadeh et al.                 | RO, two-stage ST                | Relief cost, blood demand, and supply, the capacity of facilities and shelters                                                                       |
| Kamyabniya et al.                  | RO, FZP                         | Demand and donation of blood products                                                                                                                |
| Kinay et al.                       | ST-CCP                          | Demand for relief items                                                                                                                              |
| Liu et al. (2018)                  | RO, ST                          | Demand for relief, affected population, flight time                                                                                                  |
| Liu et al. (2019b)                 | Robust model predictive control | Demand and supply of relief commodities, number of injuries, the capacity of facilities for injuries                                                 |
| Maharjan and Hanaoka               | FZP-CCP                         | demand and supply of relief items, relief costs                                                                                                      |
| Mahootchi & Golmohammadi (2018)    | Two-stage ST                    | transportation capacity, route capacity, relief demand, relief costs                                                                                 |
| Mohammadi et al. (2016)            | EVST                            | demand for relief items, relief costs                                                                                                                |
| Mohammadi & Yaghoubi               | ST                              | Travel time, relief costs, number of injuries, relief demand, treatment time,                                                                        |
| Mohammadi et al. (2020)            | RO, FZP                         | the demand for relief items, relief costs, transportation time, and capacity of facilities                                                           |
| Najafi et al. (2013)               | RO                              | demand and supply of relief items, number of injuries                                                                                                |
| Ni et al.                          | Min-Max RO, two-stage ST        | relief costs, demand for relief items, and capacity of facilities for relief items                                                                   |
| Noyan & Kahvesioglu                | Two-stage ST, Mean-risk, CVAR   | relief costs, demand for relief items, and demand coverage of facilities for relief items                                                            |
| Ozbay et al.                       | Three-stage ST, CVAR            | number of affected populations                                                                                                                       |
| Paul and MacDonald                 | EVST                            | number of injuries, relief costs, commodities usable, travel time                                                                                    |
| Rahmani et al.                     | Scenario-based RO               | relief demand, disruption of facilities                                                                                                              |
| Rennemo et al.                     | Three-stage ST                  | The capacity of routes, demand for relief items, travel time, transportation cost                                                                    |
| Rezaei-Malek et al.                | Scenario-based RO, ST           | Travel time, shortage cost, relief demand, shortage tolerance at facilities, the proportion of prepositioned commodity                               |

|                         |                                  |                                                                                                          |
|-------------------------|----------------------------------|----------------------------------------------------------------------------------------------------------|
| Sanci & Daskin          | Two-stage ST                     | demand for relief items, repair time of route                                                            |
| Sheu                    | ST                               | Demand and supply of relief items                                                                        |
| Tofighi et al.          | FZP, ST                          | relief costs, transportation time, demand for relief items, usable inventory, the capacity of facilities |
| Torabi et al.           | Scenario-based FZP, two-stage ST | relief costs, demand, and wastage of relief items, available procurement budget                          |
| Wang & Chen (2020)      | RO, ST                           | blood demand                                                                                             |
| Yahyaee & Bozorgi-Amiri | RO                               | risk of facility disruption                                                                              |
| Zarrinpour et al.       | RO, two-stage ST                 | demand rate of relief items, service rate at hospitals, patients' waiting time, relief costs             |
| Zhang et al. (2019a)    | Three-stage ST                   | transportation time, relief demand, relief costs                                                         |
| Zokaee et al.           | Scenario-based RO, ST            | Demand and supply of relief items, shortage cost                                                         |

\*RO: robust optimization; ST: stochastic optimization; FZP: fuzzy programming; EVST: expected value ST; CCP: chance-constraint programming; CVAR: conditional value at risk

**Table S8** Group papers: Uncertainty modeling for flood, hurricane, and other types of natural disaster

| Author                       | ND | Uncertainty modeling  | Source of Uncertainty                                                                                                              |
|------------------------------|----|-----------------------|------------------------------------------------------------------------------------------------------------------------------------|
| Abazari et al.               | F  | EVST                  | Vehicle loading and unloading time, acquiring cost of relief items, establishing relief centers' cost, and demand of relief items. |
| Alem et al.                  | F  | Two-stage ST, CVAR    | supply and demand for emergency aid, availability of budget, accessibility of roads, the fraction of usable relief items           |
| An et al.                    | H  | EVST                  | travel cost under facility disruption scenarios, number of rescuees, service rate, waiting time.                                   |
| Davis et al.                 | H  | Two-stage ST          | supply and demand for relief items, road congestion factor                                                                         |
| Doan and Shaw                | F  | Two-stage ST          | response time, location of the disaster                                                                                            |
| Escudero et al.              | H  | Three-stage ST        | Capacity of facilities                                                                                                             |
| Garrido et al.               | F  | EVST                  | demand for relief items                                                                                                            |
| Grass et al.                 | H  | Two-stage ST          | The proportion of usable items, road capacity, relief demand                                                                       |
| Hu et al. (2017)             | F  | Two-stage ST, CVAR    | demand for relief items                                                                                                            |
| Hu et al. (2019)             | F  | Three-stage ST        | Road capability, vehicle renting cost                                                                                              |
| Kelle et al.                 | H  | RO, two-stage ST      | Total evacuees, relief costs                                                                                                       |
| Li et al. (2017)             | H  | Two-stage ST          | demand for relief items                                                                                                            |
| Li et al. (2020)             | H  | Scenario-based RO, ST | number of evacuees, transportation time                                                                                            |
| Manopiniwes & Irohara        | F  | Two-stage ST          | the demand for relief items, relief costs                                                                                          |
| Moreno et al. (2016)         | F  | Two-stage ST          | Relief demand and supply, the proportion of commodity usable, road availability                                                    |
| Moreno et al. (2018)         | F  | Two-stage ST          | Relief demand and supply, the proportion of commodity usable, road availability                                                    |
| Paul & Zhang                 | H  | Two-stage ST          | number of injuries, relief costs, commodities usable, travel time                                                                  |
| Safaei et al.                | F  | RO                    | The demand for relief items                                                                                                        |
| Shahparvari & Bodaghi (2018) | W  | FZP                   | Time-window for evacuation for vehicles                                                                                            |
| Shahparvari & Abbasi (2017)  | W  | RO, ST                | number of evacuees, evacuation time window, shelter capacity                                                                       |
| Shahparvari et al. (2017)    | W  | FZP                   | number of evacuees, evacuation time window, travel time, route disruption risk                                                     |
| Velasquez et al.             | H  | RO, two-stage ST      | The proportion of usable items, demand                                                                                             |

|                       |   |                |                                                                      |
|-----------------------|---|----------------|----------------------------------------------------------------------|
| Wang & Chen (2020)    | H | Two-stage ST   | demand for relief items, relief costs, remaining relief items usable |
| Yi et al.             | H | Multi-stage ST | Evacuation travel demand                                             |
| Zhou & Erdogan (2019) | W | Two-stage ST   | fire suppression rate, evacuation percentage, population density     |

\*RO: robust optimization; ST: stochastic optimization; FZP: fuzzy programming; EVST: expected value ST; CCP: chance-constraint programming; CVAR: conditional value at risk

**Table S9** Group papers: Geographic locations and Relief items for all types of natural disasters

| ND            | Location                                                                                                                           | Relief items and country of case study                                                                                                                                                                                                                                                                                     |
|---------------|------------------------------------------------------------------------------------------------------------------------------------|----------------------------------------------------------------------------------------------------------------------------------------------------------------------------------------------------------------------------------------------------------------------------------------------------------------------------|
| Earthquake    |                                                                                                                                    | <b><i>Food &amp; Water</i></b>                                                                                                                                                                                                                                                                                             |
|               |                                                                                                                                    | <b>Nepal:</b> Baharmand et al. (2020), Baharmand et al. (2019)                                                                                                                                                                                                                                                             |
|               |                                                                                                                                    | <b>Iran:</b> Bozorgi-Amiri et al. (2013), Mahootchi and Golmohammadi (2018), Mohammadi et al. (2016), Ghasemi et al. (2020), Sabouhi et al. (2019), Sakiani et al. (2020), Tofighi et al. (2016), Zokaee et al. (2016)                                                                                                     |
|               |                                                                                                                                    | <b>Turkey:</b> Cavdur et al. (2016)                                                                                                                                                                                                                                                                                        |
|               |                                                                                                                                    | <b>China:</b> Gao (2019), Gao and Cao (2020), Liu et al. (2019), Lu et al. (2016), Ni et al. (2018), Wang et al. (2014), Zhang et al. (2019)                                                                                                                                                                               |
|               |                                                                                                                                    | <b>Indonesia:</b> Setiawan et al. (2019)                                                                                                                                                                                                                                                                                   |
|               |                                                                                                                                    | <b>Taiwan:</b> Sheu (2014)                                                                                                                                                                                                                                                                                                 |
|               |                                                                                                                                    | <b><i>Medicine &amp; medical kits &amp; medical supplies &amp; hygiene kits</i></b>                                                                                                                                                                                                                                        |
|               |                                                                                                                                    | <b>Iran:</b> Akbarpour et al. (2020), Haeri et al. (2020), Rahmani et al. (2018), Rezaei-Malek et al. (2016), Sabouhi et al. (2019), Tofighi et al. (2016)                                                                                                                                                                 |
|               |                                                                                                                                    | <b>China:</b> Huang et al. (2015), Liu (2020)                                                                                                                                                                                                                                                                              |
|               | Asia                                                                                                                               | <b>Indonesia:</b> Setiawan et al. (2019)                                                                                                                                                                                                                                                                                   |
|               |                                                                                                                                    | <b><i>Blood products</i></b>                                                                                                                                                                                                                                                                                               |
|               |                                                                                                                                    | <b>Iran:</b> Cheraghi and Hosseini-Motlagh (2018), Fazli-Khalaf et al. (2019), Samani et al. (2018), Habibi-Kouchaksaraei et al. (2018), Haeri et al. (2020), Hosseini-Motlagh et al. (2020), Jabbarzadeh et al. (2014), Kamyabniya et al. (2018, 2019), Khalilpourazari and Khamseh (2019), Khalilpourazari et al. (2020) |
|               |                                                                                                                                    | <b>China:</b> Wang and Chen (2020)                                                                                                                                                                                                                                                                                         |
|               |                                                                                                                                    | <b><i>Relief items (equipment, tent, blanket)</i></b>                                                                                                                                                                                                                                                                      |
|               |                                                                                                                                    | <b>Iran:</b> Bozorgi-Amiri (2013), Haeri et al. (2020), Mahootchi and Golmohammadi (2018), Sabouhi et al. (2019), Sakiani et al. (2020), Tofighi et al. (2016), Zokaee et al. (2016)                                                                                                                                       |
|               |                                                                                                                                    | <b>China:</b> Ni et al. (2018), Zhang et al. (2019),                                                                                                                                                                                                                                                                       |
|               | <b>Taiwan:</b> Sheu (2014)                                                                                                         |                                                                                                                                                                                                                                                                                                                            |
|               | <b><i>General (not specified explicitly)</i></b>                                                                                   |                                                                                                                                                                                                                                                                                                                            |
|               | <b>Iran:</b> Torabi et al. (2018), Hasani and Mokhtari (2018), Mohammadi et al. (2020), Najafi et al. (2013), Najafi et al. (2014) |                                                                                                                                                                                                                                                                                                                            |
|               | <b><i>Food &amp; Water, Medicine &amp; medical kits &amp; medical supplies &amp; hygiene kits</i></b>                              |                                                                                                                                                                                                                                                                                                                            |
| North America | <b>USA:</b> Ahmadi et al. (2015)                                                                                                   |                                                                                                                                                                                                                                                                                                                            |
|               | <b><i>General (not specified explicitly)</i></b>                                                                                   |                                                                                                                                                                                                                                                                                                                            |
|               | <b>USA:</b> Ransikarbum and Mason (2016)                                                                                           |                                                                                                                                                                                                                                                                                                                            |
|               | <b><i>Food &amp; Water, Relief items (equipment, tent, blanket)</i></b>                                                            |                                                                                                                                                                                                                                                                                                                            |
| South America | <b>Chile:</b> Pérez-Galarce et al. (2017)                                                                                          |                                                                                                                                                                                                                                                                                                                            |
|               | <b><i>Relief items (equipment, tent, blanket)</i></b>                                                                              |                                                                                                                                                                                                                                                                                                                            |
| Europe        |                                                                                                                                    |                                                                                                                                                                                                                                                                                                                            |

Turkey: Kileci et al. (2015)

*General (not specified explicitly)*

Turkey: Salman and Gül (2014), Sancı and Daskin (2019)

*Food & Water, Medicine & medical kits & medical supplies & hygiene kits*

Nepal: Maharjan and Hanaoka (2020)

Haiti: Rennemo et al. (2014)

**The Caribbean**

*Relief items (equipment, tent, blanket)*

Haiti: Rennemo et al. (2014)

*General (not specified explicitly)*

Haiti: Huang and Rafiei (2019), Liberatore et al. (2014)

*Food & Water*

Iran: Abazari et al. (2020), Safaei et al. (2018)

China: Hu et al. (2017)

*Medicine & medical kits & medical supplies & hygiene kits*

India: Mollah et al. (2018)

**Asia**

Iran: Abazari et al. (2020)

*Relief items (equipment, tent, blanket)*

Iran: Abazari et al. (2020)

*General (not specified explicitly)*

China: Manopiniwes and Irohara (2017)

Iran: Abazari et al. (2020)

**North America**

*Food & Water*

USA: Hu et al. (2019)

*Food & Water, and Medicine & medical kits & medical supplies & hygiene kits*

Brazil: Alem et al. (2016), Moreno et al. (2016), Moreno et al. (2018)

Chile: Garrido et al. (2015)

Mexico: Rodríguez-Espíndola et al. (2018), Rodríguez-Espíndola et al. (2018), Mejía-Argueta et al. (2018)

**South America**

Colombia: Rivera-Royero et al. (2016)

*Relief items (equipment, tent, blanket)*

Brazil: Alem et al. (2016)

Chile: Garrido et al. (2015)

**Europe**

*General (not specified explicitly)*

UK: Doan and Shaw (2019)

*Food & water, medical items, relief items*

**Asia**

India: Mondal et al. (2019)

**Food & Water****North America**

USA: Grass et al. (2020), Velasquez et al. (2020), Wang et al. (2020), Kelle et al. (2014), Nagurney et al. (2016), Escudero et al. (2018)

**Medicine & medical kits & medical supplies & hygiene kits, and Relief items (equipment, tent, blanket, cloth)**

USA: Kelle et al. (2014), Nagurney et al. (2016), Escudero et al. (2018), Grass et al. (2020), Velasquez et al. (2020), Wang et al. (2020),

**South America****Food & Water, Medicine, equipment**

Brazil: Li et al. (2020)

**Medicine & medical kits & medical supplies & hygiene kits**

Taiwan: Sheu and Pan (2014),

South Korea: Gu et al. (2018)

**Asia****Relief items (equipment, tent, blanket, cloth)**

Taiwan: Zhou & Erdogan (2019)

**No Relief items**

Australia: Shahparvari et al. (2016), Shahparvari and Abbasi (2017), Shahparvari et al. (2017), Shahparvari and Bodaghi (2018), Shahparvari et al. (2019)
